# Supplementary material for: Orthorhombic undoped κ-Ga2O3 epitaxial thin films for sensitive, fast, and stable direct X-ray detectors
Source: Royal Society of Chemistry journal article supplement (doi:10.1039/d2tc05297k), 2023-01-01
Supplement: d2tc05297k1.pdf [file d2tc05297k1.pdf]

## SUPPORTING INFORMATION

# Orthorhombic undoped $\kappa$ -Ga<sub>2</sub>O<sub>3</sub> epitaxial thin films for sensitive, fast, and stable direct X-ray detectors

Marco Girolami<sup>\*a</sup>, Matteo Bosi<sup>b</sup>, Valerio Serpente<sup>a</sup>, Matteo Mastellone<sup>a</sup>, Luca Seravalli<sup>b</sup>, Sara Pettinato<sup>c</sup>, Stefano Salvatori<sup>c</sup>, Daniele M. Trucchi<sup>a</sup>, Roberto Fornari<sup>d,b</sup>

*a. Istituto di Struttura della Materia, Consiglio Nazionale delle Ricerche (ISM – CNR), Sede Secondaria di Montelibretti, Strada Provinciale 35D, 9, 00010 Montelibretti, Roma, Italy. \*E-mail: marco.girolami@ism.cnr.it*

*b. Istituto dei Materiali per l'Elettronica e il Magnetismo, Consiglio Nazionale delle Ricerche (IMEM – CNR), Parco Area delle Scienze 37/A, 43124 Parma, Italy.*

*c. Faculty of Engineering, Università degli Studi Niccolò Cusano, Via Don Carlo Gnocchi 3, 00166 Roma, Italy.*

*d. Department of Mathematical, Physical and Computer Sciences, Università di Parma, Parco Area delle Scienze 7/A, 43124 Parma, Italy.*

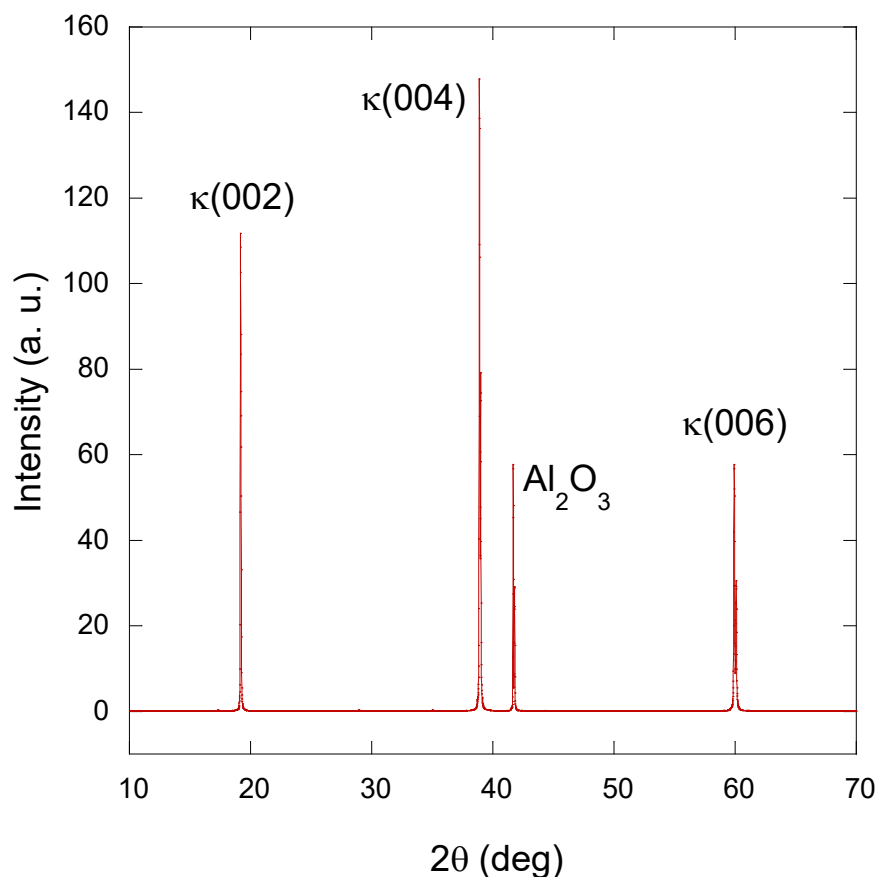

**Fig. S1.** 2 $\theta$ - $\theta$  scan of the  $\kappa$ -Ga<sub>2</sub>O<sub>3</sub> film deposited epitaxially over a (0001) Al<sub>2</sub>O<sub>3</sub> substrate.

Fig. S1 reports the XRD symmetric out-of-plane diffraction pattern obtained for the (001)-oriented  $\kappa$ -Ga<sub>2</sub>O<sub>3</sub> film deposited on *c*-plane sapphire. As can be seen, the crystal structure is purely orthorhombic. For the XRD measurements, a Rigaku Smartlab XE diffractometer with CuK<sub>α</sub> wavelength, equipped with cross beam optics unit to achieve parallel beam geometry, was used.
